# Supplementary material for: Anti-Proliferative Potential of Quercetin Loaded Polymeric Mixed Micelles on Rat C6 and Human U87MG Glioma Cells
Source: MDPI journal article supplement (doi:10.3390/pharmaceutics14081643), 2022-08-06
Supplement: s1 [file s1]

# Anti-Proliferative Potential of Quercetin Loaded Polymeric Mixed Micelles on Rat C6 and Human U87MG Glioma Cells

Sathishbabu Paranthaman <sup>1</sup>, Chinnappa A. Uthaiiah <sup>2</sup>, Riyaz Ali M. Osmani <sup>1</sup>, Umme Hani <sup>3</sup>, Mohammed Ghazwani <sup>3,4</sup>, Ali H. Alamri <sup>3</sup>, Adel Al Fatease <sup>3</sup>, SubbaRao V. Madhunapantula <sup>2</sup> and Devegowda Vishkante Gowda <sup>1, \*</sup>

<sup>1</sup> Department of Pharmaceutics, JSS College of Pharmacy, JSS Academy of Higher Education and Research, Mysuru 570015, Karnataka, India

<sup>2</sup> Centre of Excellence in Molecular Biology and Regenerative Medicine (CEMR) laboratory, (a DST-FIST Sponsored Centre) Department of Biochemistry (a DST-FIST Sponsored Department), JSS Medical College, JSS Academy of Higher Education & Research (JSS AHER), Mysuru - 570015, Karnataka, India

<sup>3</sup> Department of Pharmaceutics, College of Pharmacy, King Khalid University, Guraiger, Abha 61421, Saudi Arabia

<sup>4</sup> Cancer Research Unit, King Khalid University, Guraiger, Abha 61421, Saudi Arabia

\* Correspondence: dvgowda@jssuni.edu.in

## Supplementary Equations

**$Particle\ Size = +716.09520 + 499.87603 * Soluplus - 1038.48627E - TPGS - 4469.14112 * Poloxamer407 + 247.80037 * Soluplus * E - TPGS - 590.50167 * Soluplus * Poloxamer\ 407 + 2403.70370E - TPGS * Poloxamer\ 407 - 222.37313Soluplus^2 + 142.78996E - TPGS^2 + 9815.16333Poloxamer407^2.....(S1)$**

**$PDI = +1.11487 + 0.725355Soluplus - 1.55176E - TPGS - 9.03024Poloxamer\ 407 + 0.369629Soluplus * E - TPGS + 0.241667Soluplus * Poloxamer\ 407 + 1.62407E - TPGS * Poloxamer\ 407 - 0.323134Soluplus^2 + 0.640576E - TPGS^2 + 17.96333.....(S2)$**

**$\%EE = -42.55104 + 117.09552Soluplus + 42.08558E - TPGS - 202.60861 Poloxamer407 - 45.41852Soluplus * E - TPGS + 172.21667 Soluplus * Poloxamer\ 407 - 3.55556 * E - TPGS * Poloxamer407 * 35.74400 * Soluplus^2 + 34.08971 * E - TPGS^2 + 36.15000 * Poloxamer\ 407^2.....(S3)$**

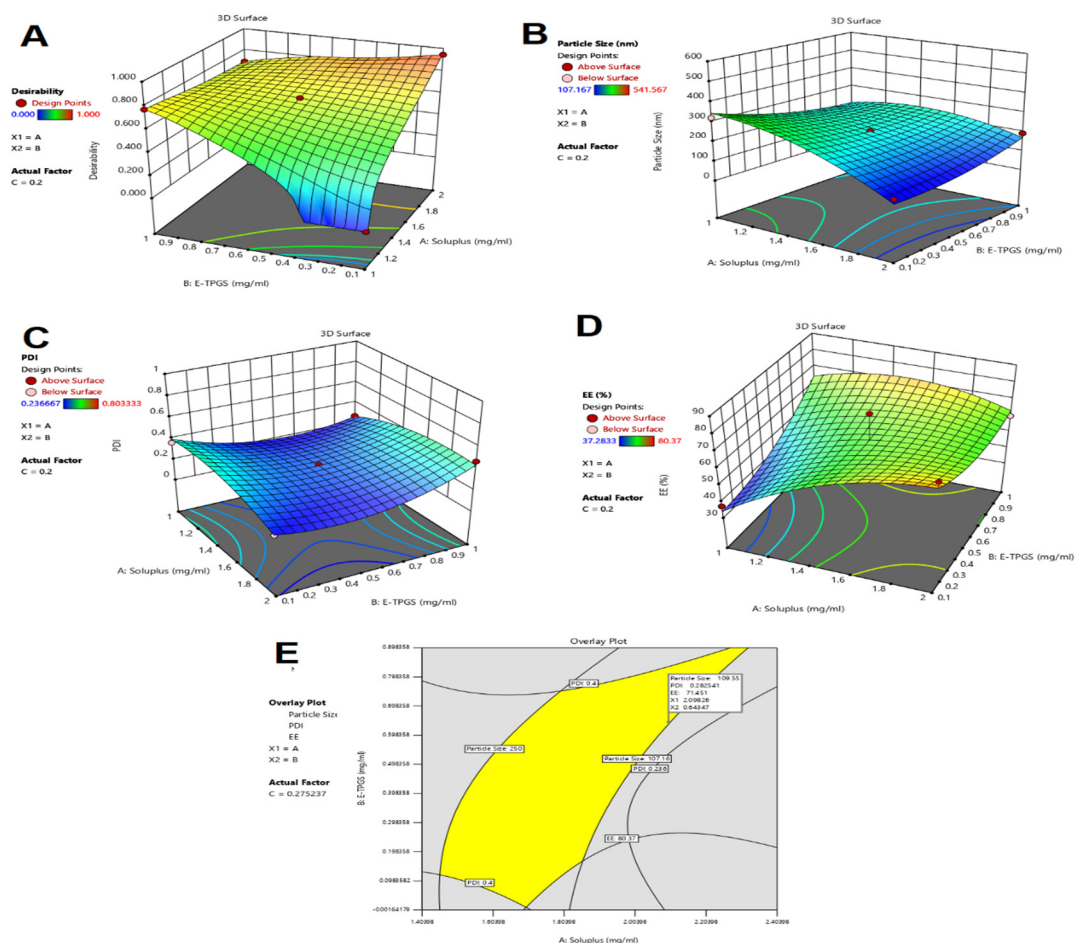

Figure S1: 3D plot analysis of impact of independent variables on dependent variables of prepared Qu-PMMs; A. Desirability, B. Particle size, C. PDI, D. %EE and E. overlay plot of optimized Qu-PMMs.

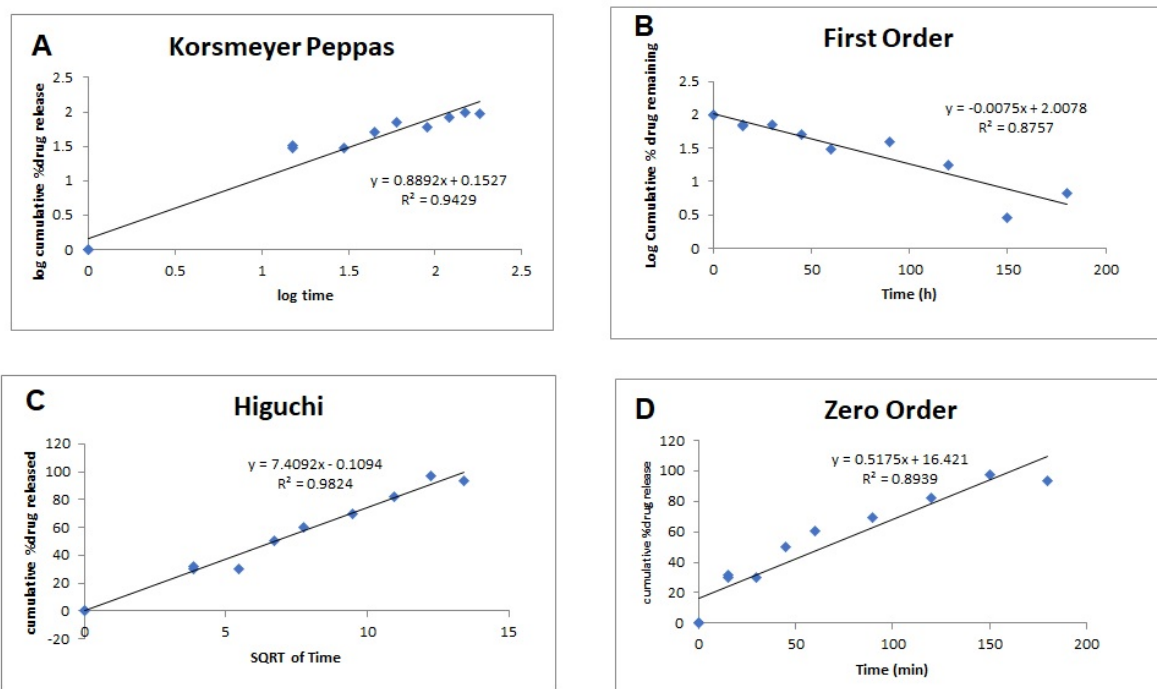

Figure S2. Drug release kinetic model; A. Korsmeyer peppas drug release model; B. First order drug release model; C. Higuchi drug release model; D. Zero order drug release model.
